# Supplementary material for: Peroxiredoxin 6 Is a Key Antioxidant Enzyme in Modulating the Link between Glycemic and Lipogenic Metabolism
Source: Hindawi journal article supplement (doi:10.1155/2019/9685607), 2019-12-20
Supplement: f1 [file 9685607.f1.pdf]

# Experimental flow diagram

**CHOW DIET**

**HIGH FAT DIET**

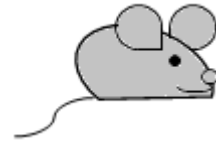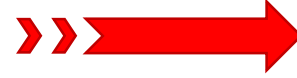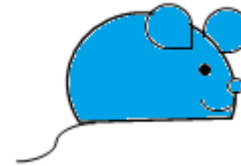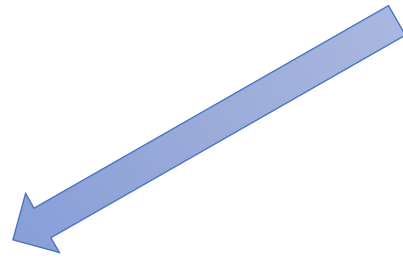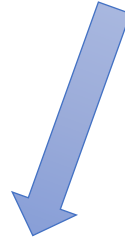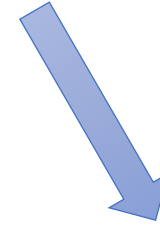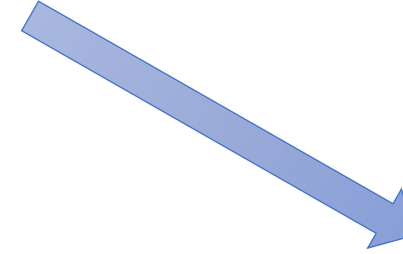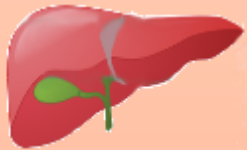

- **Lipid Metabolism**
- **Inflammatory state**
- **Glucose metabolism**
- **Steatosis score**
- **FFAs metabolism**

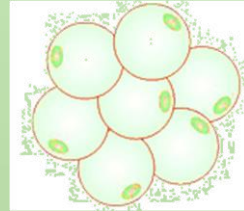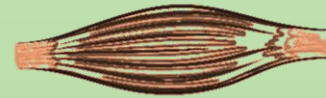

- **Lipid Metabolism**
- **Inflammatory state**
- **Glucose metabolism**

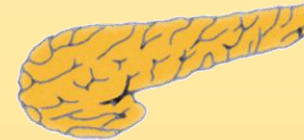

- **Histological evaluation of pancreatic islets**

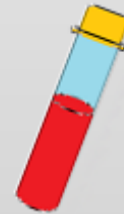

- **Glycemia (IPGTT)**
- **Insulin secretion (ITT)**
- **Blood biochemistry**
